# Supplementary material for: High-ion conducting solidified hybrid electrolytes by the self-assembly of ionic liquids and TiO2
Source: Royal Society of Chemistry journal article supplement (doi:10.1039/b903034d), 2009-01-01
Supplement: b903034d.pdf [file b903034d.pdf]

**Supplementary information:**

**High-Ion Conducting Solidified Hybrid Electrolytes by Self-  
Assembly of Ionic Liquids and TiO<sub>2</sub>**

By *U-Hwang Lee, Tetsuichi Kudo and Itaru Honma\**

[\*]

Corresponding author: Dr. Itaru Honma

Energy Technology Research Institute, National Institute of Advanced Industrial Science and  
Technology (AIST), 1-1-1 Umezono, Tsukuba, Ibaraki 305-8568, Japan

E-mail: [i.homma@aist.go.jp](mailto:i.homma@aist.go.jp)

Tel: 81-29-861-5648, Fax: 81-29-861-5799.

**Fig. S1** The TiO<sub>2</sub> electrolytes with different compositions, and their phases and activation energy values (E<sub>a</sub>).

| <b>phase</b>       | <b>IL/Ti</b> | <b>TiCl<sub>4</sub></b> | <b>BMI TFSI</b> | <b>MeOH</b> | <b>formic acid</b> | <b>E<sub>a</sub>(eV)</b> |
|--------------------|--------------|-------------------------|-----------------|-------------|--------------------|--------------------------|
| <b>solid</b>       | 0            | 1                       | 0               | 2.8         | 3.1                |                          |
|                    | 0.1          | 1                       | 0.1             | 2.8         | 3.1                |                          |
|                    | 0.2          | 1                       | 0.2             | 2.8         | 3.1                | 0.25                     |
| <b>quasi-solid</b> | 0.25         | 1                       | 0.25            | 2.8         | 3.1                | 0.27                     |
|                    | 0.3          | 1                       | 0.3             | 2.8         | 3.1                | 0.25                     |
|                    | 0.35         | 1                       | 0.35            | 2.8         | 3.1                | 0.23                     |
|                    | 0.4          | 1                       | 0.4             | 2.8         | 3.1                | 0.25                     |
|                    | 0.45         | 1                       | 0.45            | 2.8         | 3.1                | 0.23                     |
|                    | 0.5          | 1                       | 0.5             | 2.8         | 3.1                | 0.23                     |
| <b>liquid-like</b> | 0.6          | 1                       | 0.6             | 2.8         | 3.1                | 0.25                     |
|                    | 0.8          | 1                       | 0.8             | 2.8         | 3.1                | 0.23                     |
|                    | 1.2          | 1                       | 1.2             | 2.8         | 3.1                | 0.21                     |
|                    | 1.6          | 1                       | 1.6             | 2.8         | 3.1                | 0.23                     |

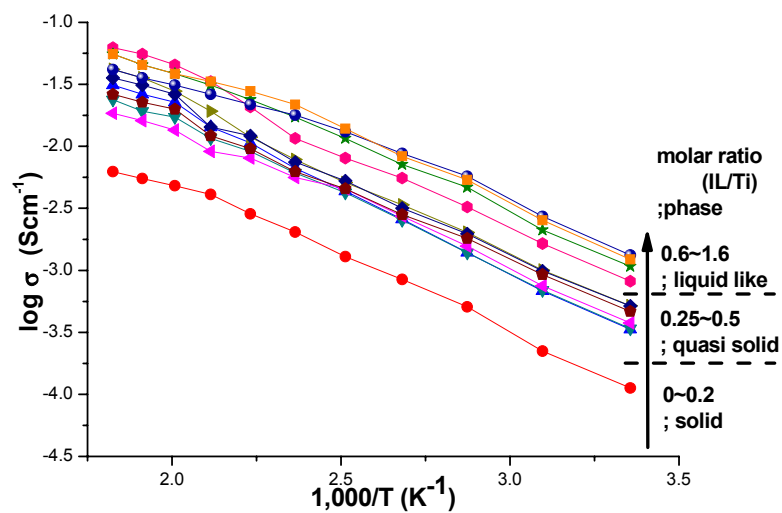

**Fig. S2** Arrhenius plots of  $\text{TiO}_2$  electrolytes with different molar ratio of the BMI TFSI and  $\text{TiO}_2$  (IL/Ti). The Arrhenius plots  $\log \sigma$  vs  $1000/T$  also show the step increase with phase transition of the  $\text{TiO}_2$  electrolytes in temperature region of  $25 \sim 200^\circ\text{C}$ . The linear plots let to estimated activation energies within the range  $0.21 \sim 0.27 \text{ eV}$  between  $25 \sim 275^\circ\text{C}$ . (see also Table S1)

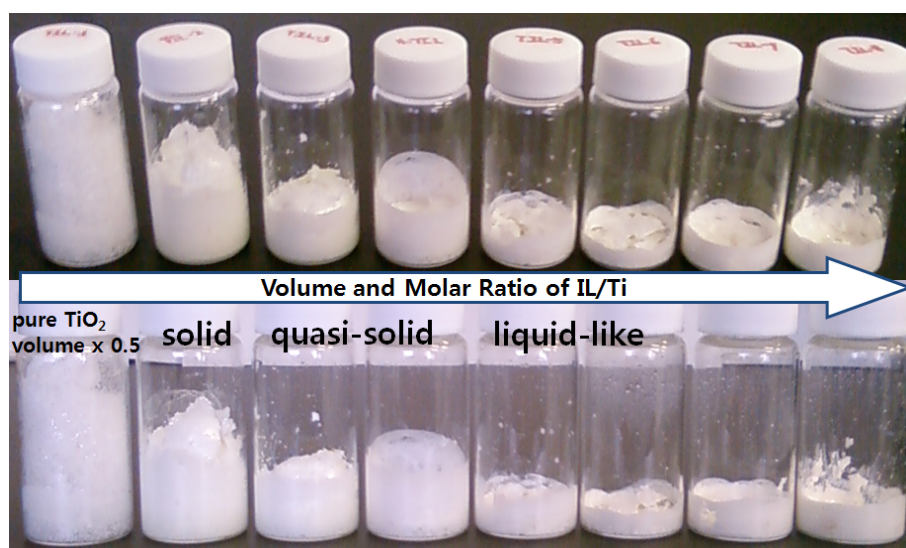

**Fig. S3** Photographs of the TiO<sub>2</sub> electrolytes in vials. The product volumes were decreased by increasing the ionic liquid. These illustrate a macroscopic shrinkage of the samples, and reveal an influence of ionic liquid in the self-assembly process.<sup>23-24</sup> Probably, volume change can be driven by interactions between of ionic liquid and TiO<sub>2</sub> matrix.

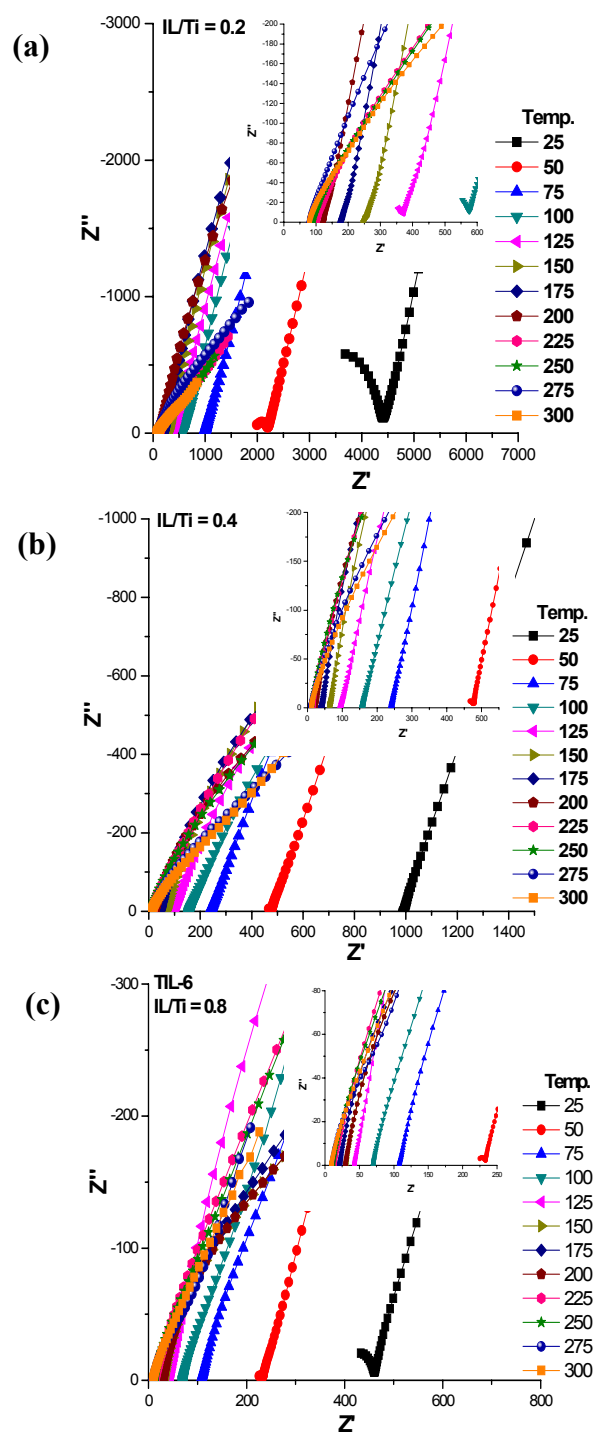

**Fig. S4** Selected impedance spectra obtained in various temperature of  $\text{TiO}_2$  electrolyte with different molar ratio of (a) IL/Ti = 0.2; solid, (b) IL/Ti = 0.4; quasi-solid and (c) IL/Ti = 0.8; liquid-like phase. The insets present the spectra on high-frequency, respectively.

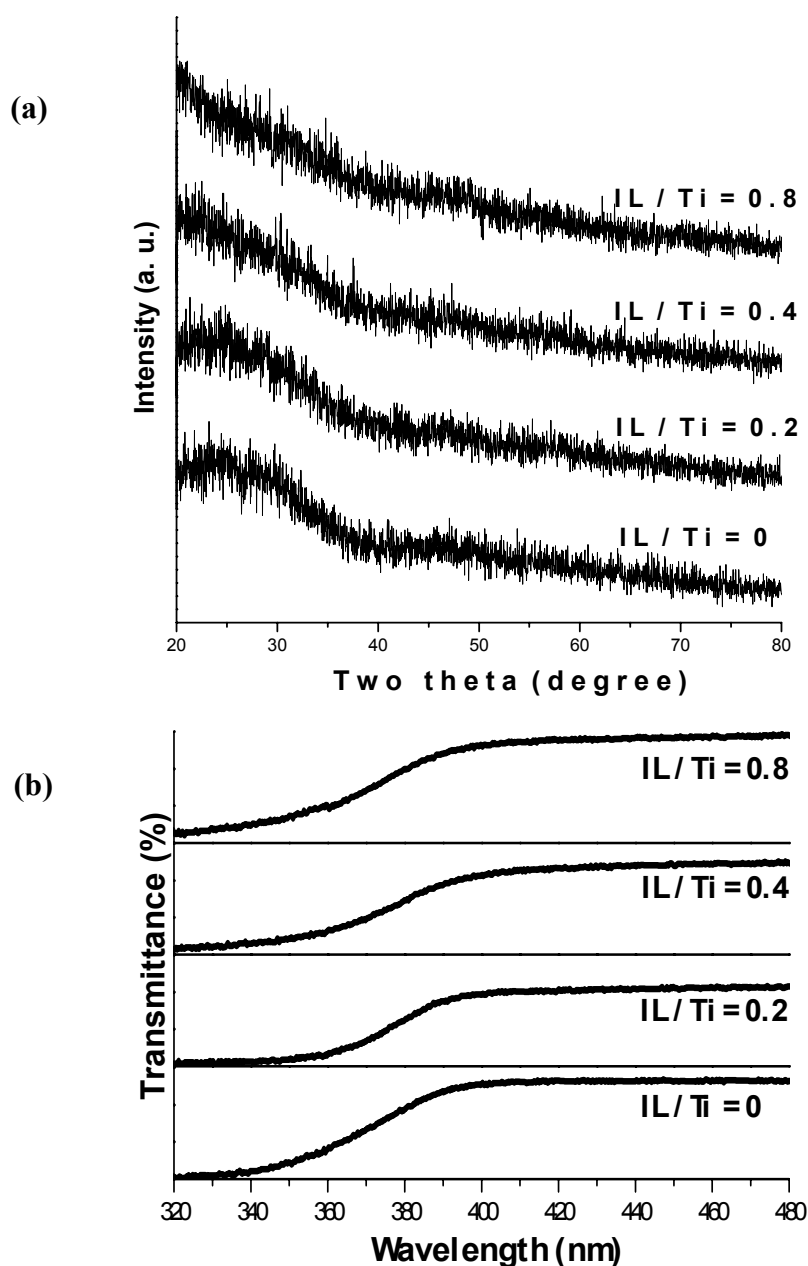

**Fig. S5** Selected (a) X-ray diffraction patterns and (b) Transmittance UV-Vis spectra of the  $\text{TiO}_2$  electrolytes with different molar ratios of IL/Ti = 0; amorphous  $\text{TiO}_2$ , IL/Ti = 0.2; solid, IL/Ti = 0.4; quasi-solid and IL/Ti = 0.8; liquid-like phase, respectively. The results of pure  $\text{TiO}_2$  (IL/Ti = 0) are also showed. In the UV-Vis result, clearly the electrolyte samples present characteristic bands of  $\text{TiO}_2$  at  $\sim 320$  nm. The X-ray diffraction patterns, the oxides are formed mainly with the amorphous structure.

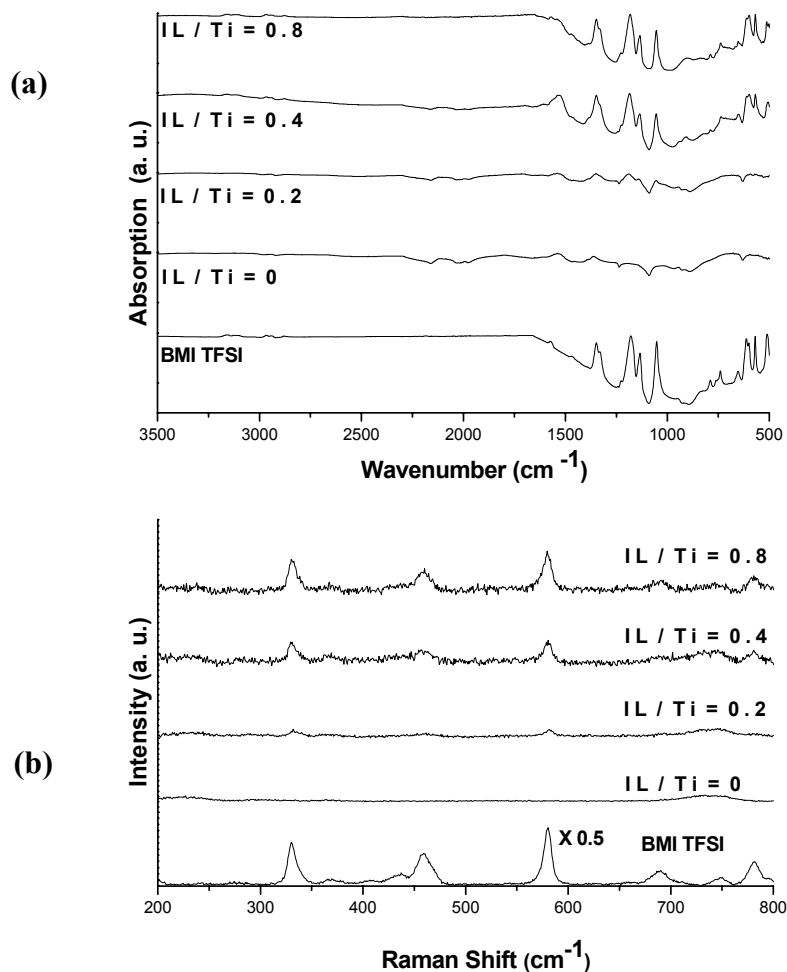

**Fig. S6** Selected (a) FT-IR and (b) Raman spectra (with the 632.8 nm laser) of the TiO<sub>2</sub> electrolytes with different molar ratios of BMI TFSI, IL/Ti = 0; ionic liquid (BMI TFSI), amorphous TiO<sub>2</sub>, IL/Ti = 0.2; solid, IL/Ti = 0.4; quasi-solid and IL/Ti = 0.8; liquid-like phase, respectively. All the samples spectra are very similar and are in agreement with the previously described spectra of pure ionic liquid. These results indicate that the increase of the ionic liquid amount in the matrix.
